# Supplementary material for: Network topology of the marmoset connectome
Source: PubMed Central journal article supplement (PMC7781610; doi:10.1162/netn_a_00159), 2020-12-01
Supplement: netn-04-1181-s001.pdf [file netn-04-1181-s001.pdf]

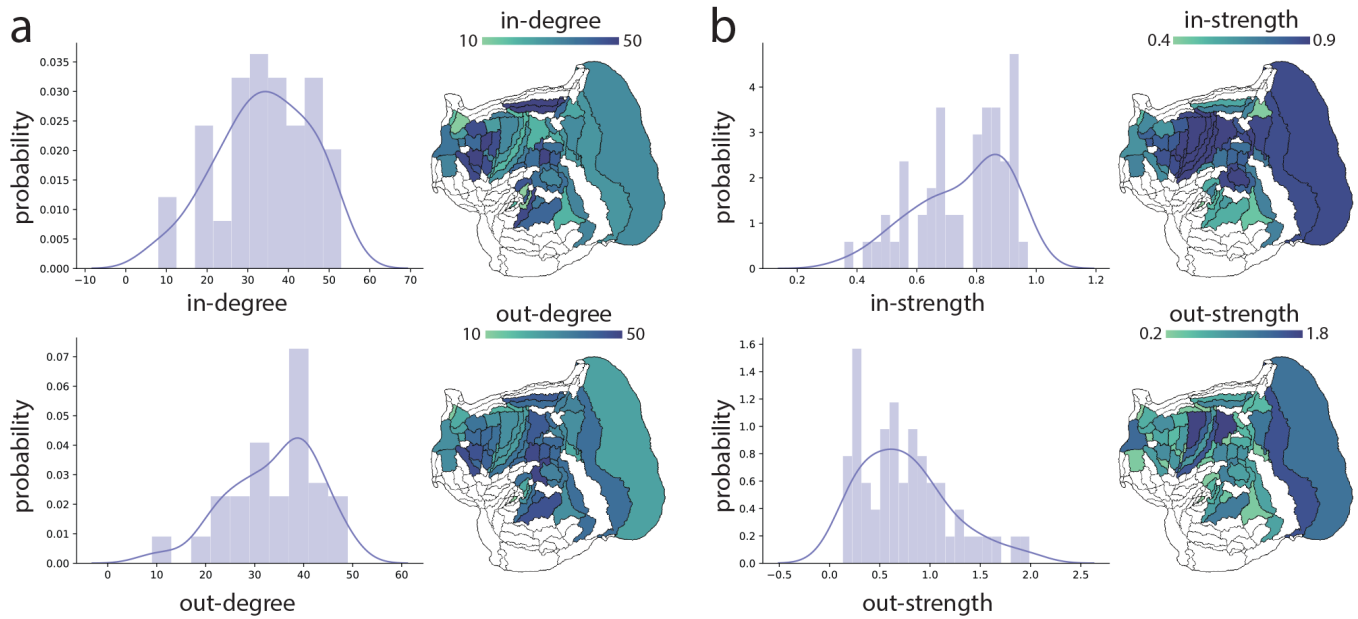

Figure S1. **Degree and strength distributions** | (a) Probability density of the binary in- and out-degree for each of the 55 nodes in the network. (b) Probability density of the weighted in- and out-strength for each of the 55 nodes in the network. All metrics are projected to a flatmap.
